# Supplementary material for: Mobile health interventions to promote physical activity and reduce sedentary behaviour in the workplace: A systematic review
Source: PubMed Central journal article supplement — Digit Health. 2019 Mar 27;5:2055207619839883. doi: 10.1177/2055207619839883 (PMC6437332; doi:10.1177/2055207619839883), 2019-03-27
Supplement: Supplemental_Material2.pdf [file Supplemental_Material2.pdf]

## **Additional File 2: Master search strategy**

**Intervention:** mHealth OR m-health OR "mobile health" OR (mobile adj3 (program\* or intervention\* or app\* or device)) OR "mobile phone" OR (cell\* phone) OR cellphone OR smartphone OR "smart phone" OR PDA OR "personal digital assistant" OR tablet OR (smart\* adj2 (sensor or app\*)) OR (wearable adj3 (monitor or tracker or device)) OR (activity adj2 (monitor or tracker or device)) OR (digital adj3 (monitor or tracker or device)) OR (mobile gam\*) OR exergam\*

AND

**Outcome:** "Physical activity" OR PA OR exercise OR fitness OR inactiv\* OR sedentar\* OR sitting OR "screen time" OR "leisure activity" OR walk\* OR step\* OR sport\*

AND

**Population/Setting:** Worksite\* OR work-base\* OR workplace\* OR worker\* OR occupation\* OR employ\* OR profession\* OR organi?ation\* OR office\*
