# Supplementary material for: Mobile health interventions to promote physical activity and reduce sedentary behaviour in the workplace: A systematic review
Source: PubMed Central journal article supplement — Digit Health. 2019 Mar 27;5:2055207619839883. doi: 10.1177/2055207619839883 (PMC6437332; doi:10.1177/2055207619839883), 2019-03-27
Supplement: Supplemental_Material3.pdf [file Supplemental_Material3.pdf]

### **Additional File 3: Example search strategy for Ovid MEDLINE®**

1. exp Telemedicine/
2. mHealth.ti,ab.
3. exp Cell Phones/
4. m-health.ti,ab.
5. "mobile health".ti,ab.
6. exp Mobile Applications/
7. (mobile adj3 (program\* or intervention\* or app\* or device)).ti,ab.
8. "mobile phone".ti,ab.
9. (cell\* phone or cellphone).ti,ab.
10. exp Computers, Handheld/ or exp Smartphone/
11. (smartphone or smart phone).ti,ab.
12. PDA.ti,ab.
13. "personal digital assistant".ti,ab.
14. tablet.ti,ab.
15. (smart\* adj2 (sensor or app\*)).ti,ab.
16. (wearable adj3 (monitor or tracker or device)).ti,ab.
17. (activity adj2 (monitor or tracker or device)).ti,ab.
18. (digital adj3 (monitor or tracker or device)).ti,ab.
19. exp Fitness Trackers/
20. mobile gam\*.ti,ab.
21. exp Video Games/
22. exergam\*.ti,ab.
23. exp Exercise/
24. "physical activity".ti,ab.
25. PA.ti,ab.
26. exercise.ti,ab.
27. exp Physical Fitness/
28. fitness.ti,ab.
29. inactiv\*.ti,ab.

30. exp Sedentary Lifestyle/
31. sedentar\*.ti,ab.
32. sitting.ti,ab.
33. "screen time".ti,ab.
34. "leisure activity".ti,ab.
35. exp Walking/ or exp Walk Test/
36. walk\*.ti,ab.
37. step\*.ti,ab.
38. exp Sports/
39. sport\*.ti,ab.
40. exp Work/
41. (worksite\* or work-base\* or workplace\* or worker\*).ti,ab.
42. exp Occupations/
43. occupation\*.ti,ab.
44. exp Occupational Health/
45. employ\*.ti,ab.
46. organi?ation.ti,ab.
47. office\*.ti,ab.
48. profession\*.ti,ab.
49. 1 or 2 or 3 or 4 or 5 or 6 or 7 or 8 or 9 or 10 or 11 or 12 or 13 or 14 or 15 or 16 or 17 or 18 or 19 or 20 or 21 or 22
50. 23 or 24 or 25 or 26 or 27 or 28 or 29 or 30 or 31 or 32 or 33 or 34 or 35 or 36 or 37 or 38 or 39
51. 40 or 41 or 42 or 43 or 44 or 45 or 46 or 47 or 48
52. 49 and 50 and 51
53. limit 52 to (humans and yr="2007 -Current")
